# Supplementary material for: INDEX-db: The Indian Exome Reference Database (Phase I)
Source: PubMed Central journal article supplement (PMC6441288; doi:10.1089/cmb.2018.0199), 2019-03-06
Supplement: Supp_Table1.pdf [file Supp_Table1.pdf]

## Supplementary Material

SUPPLEMENTARY TABLE S1. COMPARISON OF INDEX-DB WITH OTHER PUBLIC DATABASES

|                  | Full<br>INDEX-db | %     | ExAC-SAS and<br>INDEX-db—<br>Common | %     | ExAC-SAS and<br>INDEX-db—<br>Unique | %     | ExAC-full<br>and INDEX-<br>db—Common | %     | ExAC-full<br>and INDEX-<br>db—Unique | %     | SAS-AP<br>and INDEX-<br>db—Common | %     | SAS-AP<br>and INDEX-<br>db—Unique | %     | Total<br>Unique in<br>INDEX-db | %     |
|------------------|------------------|-------|-------------------------------------|-------|-------------------------------------|-------|--------------------------------------|-------|--------------------------------------|-------|-----------------------------------|-------|-----------------------------------|-------|--------------------------------|-------|
| <b>Coding</b>    |                  |       |                                     |       |                                     |       |                                      |       |                                      |       |                                   |       |                                   |       |                                |       |
| Silent           | 39,316           | 9.89  | 34,900                              | 8.78  | 4416                                | 1.11  | 36,687                               | 9.23  | 2629                                 | 0.66  | 13,355                            | 3.36  | 25,961                            | 6.53  | 2629                           | 0.66  |
| Splice site      | 499              | 0.13  | 303                                 | 0.08  | 197                                 | 0.05  | 434                                  | 0.11  | 66                                   | 0.02  | 61                                | 0.02  | 439                               | 0.11  | 66                             | 0.02  |
| Missense         | 46,550           | 11.72 | 37,360                              | 9.4   | 9190                                | 2.31  | 40,826                               | 10.27 | 5724                                 | 1.44  | 11,133                            | 2.8   | 35,417                            | 8.91  | 5724                           | 1.44  |
| Indel            | 1637             | 0.41  | 465                                 | 0.12  | 1172                                | 0.29  | 1581                                 | 0.4   | 56                                   | 0.01  | 74                                | 0.02  | 1563                              | 0.39  | 56                             | 0.01  |
| Nonsense         | 735              | 0.18  | 454                                 | 0.11  | 281                                 | 0.07  | 547                                  | 0.14  | 188                                  | 0.05  | 91                                | 0.02  | 644                               | 0.16  | 188                            | 0.05  |
| Unknown          | 1929             | 0.49  | 1500                                | 0.38  | 429                                 | 0.11  | 1732                                 | 0.44  | 197                                  | 0.05  | 394                               | 0.1   | 1535                              | 0.39  | 197                            | 0.05  |
| Total coding     | 90,666           | 22.82 | 74,982                              | 18.87 | 15,685                              | 3.95  | 81,807                               | 20.59 | 8860                                 | 2.23  | 25,108                            | 6.32  | 65,559                            | 16.5  | 8860                           | 2.23  |
| <b>Noncoding</b> |                  |       |                                     |       |                                     |       |                                      |       |                                      |       |                                   |       |                                   |       |                                |       |
| Intron           | 134,278          | 33.79 | 54,980                              | 13.84 | 79,298                              | 19.96 | 126,154                              | 31.75 | 8124                                 | 2.04  | 52,848                            | 13.3  | 81,430                            | 20.49 | 8124                           | 2.04  |
| Intergenic       | 67,814           | 17.07 | 4647                                | 1.17  | 63,168                              | 15.9  | 50,930                               | 12.82 | 16,885                               | 4.25  | 12,625                            | 3.18  | 55,190                            | 13.89 | 16,885                         | 4.25  |
| 3' UTR           | 43,816           | 11.03 | 4365                                | 1.1   | 39,451                              | 9.93  | 41,842                               | 10.53 | 1974                                 | 0.5   | 19,704                            | 4.96  | 24,112                            | 6.07  | 1974                           | 0.5   |
| 5' UTR           | 10,605           | 2.67  | 2967                                | 0.75  | 7638                                | 1.92  | 10,041                               | 2.53  | 564                                  | 0.14  | 3771                              | 0.95  | 6834                              | 1.72  | 564                            | 0.14  |
| Upstream         | 6462             | 1.63  | 666                                 | 0.17  | 5796                                | 1.46  | 4984                                 | 1.25  | 1478                                 | 0.37  | 1640                              | 0.41  | 4822                              | 1.21  | 1478                           | 0.37  |
| Downstream       | 4417             | 1.11  | 401                                 | 0.1   | 4016                                | 1.01  | 3410                                 | 0.86  | 1007                                 | 0.25  | 1303                              | 0.33  | 3114                              | 0.78  | 1007                           | 0.25  |
| ncRNA            | 39,278           | 9.89  | 6825                                | 1.72  | 32,453                              | 8.17  | 29,438                               | 7.41  | 9840                                 | 2.48  | 9327                              | 2.35  | 29,951                            | 7.54  | 9840                           | 2.48  |
| Total noncoding  | 306,670          | 77.18 | 74,851                              | 18.84 | 231,820                             | 58.34 | 266,799                              | 67.15 | 39,872                               | 10.03 | 101,218                           | 25.47 | 205,453                           | 51.71 | 39,872                         | 10.03 |
| Total SNV        | 397,336          | 100   | 149,833                             | 37.71 | 247,505                             | 62.29 | 348,606                              | 87.74 | 48,732                               | 12.26 | 126,326                           | 31.79 | 271,012                           | 68.21 | 48,732                         | 12.26 |

The “%” columns show the percentage with respect to the total number of variants in INDEX-db (397,336).
